# Supplementary material for: Extended fragrance ingredients surveillance study (EFISS)—protocol for a clinical surveillance study on contact allergy to 7 fragrance materials in widespread use but hitherto not systematically patch tested
Source: Springer Nature journal article supplement (doi:10.1007/s00403-025-04286-9), 2025-05-23
Supplement: MOESM1 [file 403_2025_4286_MOESM1_ESM.pdf]

# Case Report Form (CRF)

IDEA Extended Fragrance Ingredients Surveillance Study (EFISS):  
*Surveillance Study to Monitor the Frequency of Contact Allergy to a Defined Group of Fragrance Ingredients with a View to Providing Reliable Information on Trends*

*It should be noted that this is a paper representation of the eCRF and, for technical reasons, may not be a completely faithful reproduction of the eCRF. However, it is the primary record and data from it will be entered into the eCRF for analysis.*

**Study Centre:**

**IDEA Patient ID:**

**Date of examination (YYYY):**

## Patient Details

**Sex:** ☐ Male ☐ Female ☐ Unknown/Other

☐ 18 - 20 ☐ 21-25 ☐ 26 -30 ☐ 31 – 35 ☐ 36-40 ☐ 41 – 45

☐ 46 – 50 ☐ 51 -55 ☐ 56 – 60 ☐ 61 – 65 ☐ 66 – 70 ☐ 71 -75

☐ 76 – 80 ☐ 81 – 85 ☐ 86 +

**Occupation per ISCO.08. See list attached.**

**Code:**

**Exclusion/Exclusion criteria:**

Subjects will be consecutive dermatitis patients. Subjects will be those attending established departments within the selected centres for routine diagnostic patch test investigations.

**No specific exclusion criteria other those covered by the ESCD guidelines (*European Society of Contact Dermatitis guideline for diagnostic patch testing – recommendations on best practice, 2015*)**

Study Centre:

IDEA Patient ID:

## Patient History

Atopic eczema (Currently) Yes ☐ No ☐ Unknown ☐

Atopic eczema (Previously) Yes ☐ No ☐ Unknown ☐

## Present Dermatitis Leading to Current Testing

Onset of present dermatitis (MM/YY):

## Localisation of this Dermatitis

Indicate locations:

Hands ☐

Arms ☐

Trunk ☐

Neck ☐

Eyelids ☐

Scalp ☐

Face (Rest of) ☐

Legs ☐

Feet ☐

Ano/Genital area ☐

Axillae ☐

Other ☐

## Previous Fragrance-Related Dermatitis

Previously patch tested?

Unknown ☐

Yes ☐

No ☐

If Yes, date (YYYY) previously tested: \_\_\_\_\_

Outcome of testing:

☐ Yes, positive FM I

☐ Yes, positive FM II

☐ Yes, positive for other (Please specify):

☐ Yes, but tested negative to fragrances

☐ Unknown, e.g., patient cannot remember

**Study Centre:**

**IDEA Patient ID:**

**Previous<sup>1</sup> dermatitis:**

**Yes** ☐

**No** ☐

**Onset of previous dermatitis (YYYY):**

**Resolution of previous dermatitis (YYYY):**

---

<sup>1</sup> I.e., excluding “present” dermatitis as above

Study Centre:

IDEA Patient ID:

### **Patch test preparation and performance**

As standard practice, the test material should be stored at/below 4 degrees C prior to preparation, prepared less than 30 minutes before application and the test location should be on the back.

Study Centre:

IDEA Patient ID:

Were Chemotechnique-supplied syringes containing both standard and Additional Materials used for the study? Yes ☐ No ☐

If not, was a detailed list of non-Chemotechnique materials used agreed in advance with the Study Managers?

Yes ☐

No ☐

Was this agreed list adhered to?

Yes ☐

No ☐

If not detail any exceptions:

---

### **Test location:**

If test location other than back, please indicate location used:

---

Only for patients under immunosuppressive drug: please enter medication and dose:

Has the patient been advised that they should contact the centre should any reactions occur up to 28 days subsequent to the test application that they should contact the centre for re-evaluation?

Yes ☐

No ☐

Positive test outcome

Positive to at least one of the 7 additional fragrance allergen materials

Yes ☐

No ☐

In the event of a positive reaction for the additional materials only (Not required for standard materials) the EFISS Management Team should be contacted either by email or telephone/SMS.

Matthias Vey: [mvey@ifrafragrance.org](mailto:mvey@ifrafragrance.org)

+32 497 666206

Joseph Huggard: [jh@huggardconsulting.com](mailto:jh@huggardconsulting.com)

+352 661 530613

Study Centre:

IDEA Patient ID:

**Patch Test Reading Sheet (A detailed sheet to be completed for all Additional Materials with positive reactions. Not required for standard materials)**

|    | Material<br><br>Additional Materials                                                        | First<br>Reading<br><br>Day: | Second<br>Reading<br><br>Day: | Reaction<br>(Yes/No) | Detailed<br>sheet<br>completed<br>Y/N | Comment |
|----|---------------------------------------------------------------------------------------------|------------------------------|-------------------------------|----------------------|---------------------------------------|---------|
|    |                                                                                             |                              |                               |                      |                                       |         |
| 31 | Furaneol [4-Hydroxy-2,5-dimethyl-3(2H)-furanone]                                            |                              |                               |                      |                                       |         |
| 32 | trans-2-Hexenal                                                                             |                              |                               |                      |                                       |         |
| 33 | 4,8-Dimethyl-4,9-decadienal                                                                 |                              |                               |                      |                                       |         |
| 34 | Longifolene                                                                                 |                              |                               |                      |                                       |         |
| 35 | Benzaldehyde                                                                                |                              |                               |                      |                                       |         |
| 36 | <i>Evernia prunastri</i> (Oak moss) with atranol and chloroatranol content at trace levels  |                              |                               |                      |                                       |         |
| 37 | <i>Evernia furfuracea</i> (Treemoss) with atranol and chloroatranol content at trace levels |                              |                               |                      |                                       |         |

|    | Material                                               | First<br>Reading<br><br>Day: | Second<br>Reading<br><br>Day: | Reaction<br>(Yes/No) | Relevance <sup>2</sup><br><br>(See<br>footnote) | Comment |
|----|--------------------------------------------------------|------------------------------|-------------------------------|----------------------|-------------------------------------------------|---------|
|    | <b>Fragrance Mixes</b>                                 |                              |                               |                      |                                                 |         |
| 1  | Fragrance Mix I                                        |                              |                               |                      |                                                 |         |
| 2  | Sorbitan Sesquioleate                                  |                              |                               |                      |                                                 |         |
| 3  | Fragrance Mix II                                       |                              |                               |                      |                                                 |         |
| 4  | <i>Myroxylon pereirae</i> (Balsam of Peru) oil         |                              |                               |                      |                                                 |         |
|    | <b>FM I Constituents</b>                               |                              |                               |                      |                                                 |         |
| 5  | Amyl cinnamal                                          |                              |                               |                      |                                                 |         |
| 6  | Cinnamyl alcohol                                       |                              |                               |                      |                                                 |         |
| 7  | Cinnamal                                               |                              |                               |                      |                                                 |         |
| 8  | Eugenol                                                |                              |                               |                      |                                                 |         |
| 9  | Geraniol                                               |                              |                               |                      |                                                 |         |
| 10 | Hydroxycitronellal                                     |                              |                               |                      |                                                 |         |
| 11 | Isoeugenol                                             |                              |                               |                      |                                                 |         |
| 12 | <i>Evernia prunastri</i> (Oak moss extract)            |                              |                               |                      |                                                 |         |
|    | <b>FM II Constituents</b>                              |                              |                               |                      |                                                 |         |
| 13 | HICC (Hydroxyisohexyl 3-cyclohexene<br>carboxaldehyde) |                              |                               |                      |                                                 |         |
| 14 | Citral                                                 |                              |                               |                      |                                                 |         |
| 15 | Citronellol                                            |                              |                               |                      |                                                 |         |
| 16 | Farnesol                                               |                              |                               |                      |                                                 |         |
| 17 | Coumarin                                               |                              |                               |                      |                                                 |         |
| 18 | Hexyl cinnamal                                         |                              |                               |                      |                                                 |         |
|    | <b>Non-mix Fragrances</b>                              |                              |                               |                      |                                                 |         |
| 19 | Amylcinnamyl alcohol                                   |                              |                               |                      |                                                 |         |
| 20 | Benzyl salicylate                                      |                              |                               |                      |                                                 |         |
| 21 | Anisyl alcohol                                         |                              |                               |                      |                                                 |         |
| 22 | Benzyl alcohol                                         |                              |                               |                      |                                                 |         |
| 23 | Benzyl cinnamate                                       |                              |                               |                      |                                                 |         |
| 24 | Butylphenyl methylpropional                            |                              |                               |                      |                                                 |         |
| 25 | Linalool (non-ox.)                                     |                              |                               |                      |                                                 |         |
| 26 | Benzyl benzoate                                        |                              |                               |                      |                                                 |         |
| 27 | Limonene (non-ox.)                                     |                              |                               |                      |                                                 |         |
| 28 | Methyl 2-Octynoate                                     |                              |                               |                      |                                                 |         |
| 29 | Alpha-isomethyl ionone                                 |                              |                               |                      |                                                 |         |
| 30 | <i>Evernia furfuracea</i> (Treemoss extract)           |                              |                               |                      |                                                 |         |

<sup>2</sup> For Relevance, enter CR (current relevance), PR (past relevance), UR (unknown relevance), XR (cross-reaction), NA (not allergic), and AS (active sensitisation),
